# Supplementary material for: Identification of Antigens Specific to Non-Tuberculous Mycobacteria: The Mce Family of Proteins as a Target of T Cell Immune Responses
Source: PubMed Central journal article supplement (PMC3201954; doi:10.1371/journal.pone.0026434), 2011-10-25
Supplement: pone.0026434.s003.pdf [file pone.0026434.s003.pdf]

## Pool 5

### Protein accession numbers

NP\_960785.1: hypothetical protein MAP1851 [Mycobacterium avium subsp. paratuberculosis K-10]

YP\_881588.1: mce related protein [Mycobacterium avium 104]

NZ\_ABIN01000058\_P\_11090: predicted protein sequence from *M. intracellulare* genome

YP\_907368.1: Mce protein, Mce5A [Mycobacterium ulcerans Agy99]

NOTNCBI\_FOR1052\_P\_8286: predicted protein sequence from *M. fortuitum* genome

YP\_879398.1: mce related protein [Mycobacterium avium 104]

NP\_959042.1: hypothetical protein MAP0108 [Mycobacterium avium subsp. paratuberculosis K-10]

NZ\_ABIN01000014\_P\_12211: predicted protein sequence from *M. intracellulare* genome

YP\_001705239.1: putative Mce family protein [Mycobacterium abscessus ATCC 19977]

YP\_001701754.1: putative MCE family protein [Mycobacterium abscessus ATCC 19977]

YP\_001705291.1: putative Mce family protein [Mycobacterium abscessus ATCC 19977]

YP\_001702434.1: putative Mce family protein [Mycobacterium abscessus ATCC 19977]

YP\_001705322.1: putative Mce family protein [Mycobacterium abscessus ATCC 19977]

### Peptide sequences

VKVDAQLMNVGDGLPERADV  
GDGLPERADVKFRGMLVGAV  
KFRGMLVGAVTSVTPAEDGK  
TSVTPAEDGKPNIVHIDLKS  
PNIVHIDLKSEHAGGIPSTV  
EHAGGIPSTVTARVPSNVF  
TARVPSNVFAVSSVQLVDN  
GDGAGIRNGAIITEDT  
RNGAIITEDTKLPTVLFQTT  
KLPTVLFQTTNKLQVLAA  
TERQRGDPPVGLIGVFGAT  
GARLQAILTEFNAMVTASPN  
FNAMVTASPNDPSTIAALEK  
DPSTIAALEKVSDALSTTSP  
VSDALSTTSPRLLDNLENAL  
VPLRTLQAKKDDVRGLLSAG  
DDVRGLLSAGLHTTGTTATA  
IDNHIDQMIGIGHTLTPVVG  
VLAQNADKFPVIATRVRALS  
PIATRVRALSDAAFANGWDP  
DAAFANGWDPGRQVIGLNLI  
GRQVIGLNLI LSFSPAWTYV  
LSFSPAWTYVRDDCPRYGEL

AGPSCTTAPETRWIDIEV  
TRQWIDIEVLQPGSYKPPP  
DIAPPPGTVFPPPAADIMLH  
PPPAADIMLHGTGPNPQE  
GTGPNPQEVDRANPVLV  
GPVGS AVEREQLGKALGG  
MANSDFDGRGPTDHQ  
LKSTGRINDYIRVVAELTNV  
IRVVAELTNVGDGLPARSDV  
GDGLPARSDVKYHGLLVGAV  
KYHGLLVGAVDNVIPAAYGK  
DNVIPAAYGKPNYVHINLKP  
PNYVHINLKPEYAQDIPSAV  
EYAQDIPSAVTARVPSNVF  
TARVPSNVFAVSSVQLVDG  
AVSSVQLVDGAPGPSI  
APGPSIRNGARIPEDL  
RNGARIPEDLQLVSTVIFQTT  
NNRRGPLLTAGAQLTRVLDE  
GAQLTRVLDELNAIVATDPG  
PSTVSALLDATRGLQSTAP  
ATRGLQSTAPDLVDVLHDAV  
DLVDVLHDAVRPMQTLVEKR

RPMQTLVEKREQFRSLVTGS  
EQFRSLVTGSYHTFSVNRQA  
YHTFSVNRQAFDNHTDQLIE  
FDNHTDQLIEMTQNLTPVLG  
MTQNLTPVLGVFAMNSDKFV  
VFAMNSDKFVPIFTRLNRLS  
PIFTRLNRLSDKFFQEVWDP  
DKFFQEVWDP ELDTGNMRVN  
ELDTGNMRVNLALPTTYTYT  
LALPTTYTYTRADCPRYGQL  
QGSPCFTAPTIAVRPDLPEV  
IAVRPDLPEVLLPQNYHPPT  
DLAPPPGTQIGPDGNLVATG  
PPLYNPDP SLADPNPPLP  
SLADPNPPLPWWPWQIGPAP  
WWPWQIGPAPRVPGTADPDD  
VAPAA YGGNVGPVGSQRERD  
QLGLITGQGRPASVATQLLL  
AVSSVQLVGNPGPSKI  
GPGSKIRDGAHIPEDK  
PASEATQLLLGPVARGTTVS

## Pool 6

### Protein accession numbers

NP\_960792.1: hypothetical protein MAP1858 [Mycobacterium avium subsp. paratuberculosis K-10]

YP\_881582.1: hypothetical protein MAV\_2381 [Mycobacterium avium 104]

NZ\_ABIN01000058\_P\_11097: predicted protein sequence from *M. intracellulare* genome

YP\_001701747.1: hypothetical protein MAB\_1003c [Mycobacterium abscessus ATCC 19977]

NP\_959049.1: hypothetical protein MAP0115 [Mycobacterium avium subsp. paratuberculosis K-10]

YP\_879405.1: hypothetical protein MAV\_0109 [Mycobacterium avium 104]

NZ\_ABIN01000160\_P\_8921: predicted protein sequence from *M. intracellulare* genome

NOTNCBI\_FOR324\_P\_3844: predicted protein sequence from *M. fortuitum* genome

|                       |                       |                       |
|-----------------------|-----------------------|-----------------------|
| PVALAPLASADPPPPPPDP   | KFDQCAGQSFIRTYATLTSS  | VTKMDYKGDSARVTITALRI  |
| AAPAVDAGPPPDNGLVASA   | IRTYATLTSSTDNTDDVITY  | ARVTITALRIKIDSCVQSF   |
| PPDNGLVASAEPGVVKTDPDG | TDNTDDVITYLGVTKAV     | KIDSCVQSFIRSYATFTSA   |
| EPGVVKTDPDGWTLTVSAKDE | FGLLAASVACAASATPAWA   | IRSYATFTSATADTQDVVSY  |
| WTLTVSAKDESQLPVAPLTT  | EPAADLVESTPPAHLTTPDG  | TADTQDVVSYVGVTKAV     |
| SQLPVAPLTTAASSREYLVG  | PPAHLTTPDGWHLTVSASDE  | MASGEPTVVTTTPDD       |
| AASSREYLVGATFTGTVTGS  | TRAAVPLTTAISSREYVVG   | EPTVVTTTPDDWTLKLAATGE |
| GSTTLNGGTLDTGYQIGCGI  | AISSREYVVGTYRGSMTGP   | WTLKLAATGETQLPIPPLTT  |
| DTGYQIGCGIELGQVRL     | GTYRGSMTGPGGGDDLGRGL  | TQLPIPPLTTALSSREYLAG  |
| STLAGIIPGTGS          | GGGDDLGRGLEAGYQIGCGI  | ALSSREYLAGGFTGSVEGA   |
| LAGIIPGTGVSMPISGTIEIH | EAGYQIGCGIDMSTSNVAL   | GRTTLKGGTLEAGYQIGCGI  |
| MPISGTIEIHAKPGVTNVNS  | DMSTSNVALTGAGLNGSI    | EAGYQIGCGIELSAVRL     |
| AKPGVTNVNSVNKKSFKAAP  | LKPGIINLIPVTEKEFKGTE  | VPIQGNVEVRPKPGEVLNVS  |
| VNKKSFKAAPVRVTVKDVHI  | VTEKEFKGTEPWVMISNFRV  | PKPGEVLNVSVTQKKFEGTK  |
| VRVTVKDVHIKIDGCVGQSF  | PWVMISNFRVKIDGCVGQSF  | VTQKKFEGTKSRVTLKDVHI  |
| LRSYATLTSSTDDTDDVVAY  | KIDGCVGQSFIRSYAVLTRS  | SRVTLKDVHIKIDGCVGQSF  |
| TTDDTDDVVAYYGVTKAV    | TDESEAVLAWYGTTKVV     | LRSYAKLTSATTGTQDIVAY  |
| MTVAGSNETLLPVAPLTT    | RRSRTMLKTLAALTAAYSLA  | TTGTQDIVAYYGVTKTV     |
| TLLPVAPLTTAASSREYLVG  | AATPLAGANPTEGQVPVMP   | MAAVCLALSLPTAPTGA     |
| GTFTGKVS GGGKTKLTGGTL | WVLSVAASDETQQSVAPLTT  | MAIAVCLAMS VIAAPSADS  |
| GKTKLTGGTLEAGA QIGCGI | TQQSVAPLTTALSSREYVVG  | SVIAAPSADSE PQLGPA    |
| EAGA QIGCGIISDETEI    | ALSSREYVVGGSFMGTVKGA  | EPQLGPAPPDAA          |
| ISDETEINPGLSFTPGI     | EAGYQIGCGVNADVDA      | PPAGAAVPSNPPAILNTPDG  |
| NPGLSFTPGIKIPFTGS     | NADVVDARFGGSLTPSG     | PPAILNTPDGWTLGLGAKDE  |
| KIPFTGSAGDASLG        | RFGGSLTPSGSL          | WTLGLGAKDEM QVPVAPLTT |
| LKPGTVTIVPIDKKSFKGTG  | GGSPSLGGNLFAQIRPT     | MQVPVAPLTTAISSREYMSS  |
| IDKKSFKGTGTRVTITGVRI  | GNLFAQIRPTLKP GTTTIVP |                       |
| TRVTITGVRIKFDQCAGQSF  | LKPGTTTIVPVT KMDYKGDS |                       |
